1 Pan-cancer genomic amplifications underlie a Wnt hyperactivation phenotype  
2 associated with stem cell-like features leading to poor prognosis

3

4

5

6 Wai Hoong Chang and Alvina G. Lai

7

8

9 Nuffield Department of Medicine, University of Oxford,

10 Old Road Campus, Oxford, OX3 7FZ, United Kingdom

11

12 For correspondence: [Alvina.Lai@ndm.ox.ac.uk](mailto:Alvina.Lai@ndm.ox.ac.uk)

13 **List of Abbreviations**

14

|      |                                         |
|------|-----------------------------------------|
| TCGA | The Cancer Genome Atlas                 |
| KEGG | Kyoto Encyclopedia of Genes and Genomes |
| GO   | Gene Ontology                           |
| ROC  | Receiver operating characteristic       |
| AUC  | Area under the curve                    |
| HR   | Hazard ratio                            |
| TNM  | Tumor, node and metastasis              |
| HIF  | Hypoxia inducible factor                |
| TF   | Transcription factor                    |
| EMT  | Epithelial-to-mesenchymal transition    |

15

16 **Abstract**

17 Cancer stem cells pose significant obstacles to curative treatment contributing to tumor  
18 relapse and poor prognosis. They share many signaling pathways with normal stem cells that  
19 control cell proliferation, self-renewal and cell fate determination. One of these pathways  
20 known as Wnt is frequently implicated in carcinogenesis where Wnt hyperactivation is seen in  
21 cancer stem cells. Yet, the role of conserved genomic alterations in Wnt genes driving tumor  
22 progression across multiple cancer types remains to be elucidated. In an integrated pan-cancer  
23 study involving 21 cancers and 18,484 patients, we identified a core Wnt signature of 16 genes  
24 that showed high frequency of somatic amplifications linked to increased transcript  
25 expression. The signature successfully predicted overall survival rates in six cancer cohorts  
26 (n=3,050): bladder (P=0.011), colon (P=0.013), head and neck (P=0.026), pan-kidney  
27 (P<0.0001), clear cell renal cell (P<0.0001) and stomach (P=0.032). Receiver operating  
28 characteristic analyses revealed that the performance of the 16-Wnt-gene signature was  
29 superior to tumor staging benchmarks in all six cohorts and multivariate Cox regression  
30 analyses confirmed that the signature was an independent predictor of overall survival. In  
31 bladder and renal cancer, high risk patients as predicted by the Wnt signature had more  
32 hypoxic tumors and a combined model uniting tumor hypoxia and Wnt hyperactivation  
33 resulted in further increased death risks. Patients with hyperactive Wnt signaling had  
34 molecular features associated with stemness and epithelial-to-mesenchymal transition. Our  
35 study confirmed that genomic amplification underpinning pan-cancer Wnt hyperactivation and  
36 transcriptional changes associated with molecular footprints of cancer stem cells lead to  
37 increased death risks.

38 **Keywords:** Wnt signaling; cancer stem cells; cell adhesion; pan-cancer; genomic amplification;  
39 tumor microenvironment

## 40 Introduction

41

42 There is a requirement for tumor cells to self-renew and proliferate in order to perpetuate  
43 tumorigenesis. It is perhaps not surprising that tumor-initiating cells or cancer stem cells share  
44 similar signal transduction processes with normal stem cells<sup>1,2</sup>. The ability for self-renewal and  
45 differentiation in both stem cells and cancer stem cells have converged on a common pathway  
46 known as Wnt signaling<sup>3,4</sup>. Wnt proteins are highly conserved across the animal kingdom,  
47 functioning as developmentally important molecules controlling cell fate specification, cell  
48 polarity and homeostatic self-renewal processes in embryonic and adult stem cells<sup>5</sup>. Wnts are  
49 a group of glycoproteins serving as ligands for the frizzled receptor to initiate signaling  
50 cascades in both canonical and non-canonical pathways<sup>6</sup>. Beyond embryogenesis, Wnt  
51 proteins control cell fate determination in adults where they regulate homeostatic self-  
52 renewal of intestinal crypts and growth plates<sup>7-9</sup>.

53

54 Wnt signaling is the product of an evolutionary adaptation to growth control in multicellular  
55 organisms, and it has now become clear that aberrations in this pathway contributes to  
56 deranged cell growth associated with many disease pathologies including cancer<sup>10</sup>. Loss-of-  
57 function mutations in genes that inhibit the Wnt pathway lead to ligand-independent  
58 constitutive activation of Wnt signaling in hepatocellular carcinoma<sup>11</sup>, colorectal cancer<sup>12</sup>,  
59 gastric cancer<sup>13</sup> and acute myeloid leukemia<sup>14</sup>. Thus, inhibition of Wnt signaling would hold  
60 great promise as therapeutic targets<sup>15</sup>. A small molecule inhibitor ICG-001 functions to inhibit  
61 the degradation of the Wnt repressor Axin and treatment of colon cancer cell lines with this  
62 inhibitor resulted in increased apoptosis<sup>16</sup>. Antibodies against Wnts and frizzled receptors have  
63 also demonstrated antitumor effects<sup>17,18</sup>.

64

65 Much of the previous research on Wnt genes and cancer have focused on somatic mutations  
66 and transcriptional dysregulation of Wnt pathway members. Activating mutations of  $\beta$ -catenin  
67 have been implicated in adrenocortical tumorigenesis<sup>19</sup> and multiple gastrointestinal  
68 cancers<sup>20</sup>. Downregulation of a Wnt antagonist *DKK1*, a downstream target of  $\beta$ -catenin, is also  
69 observed in colorectal cancer<sup>21</sup>. However, there is limited understanding on the role of somatic  
70 copy number alterations in Wnt pathway genes as well as their downstream targets on driving  
71 tumor progression and patient prognosis. Studies examining the transcriptional dysregulation  
72 of Wnt pathway genes offered limited insights into whether differences in transcript  
73 abundance were caused by genomic amplifications or losses.

74

75 Given the complexity of Wnt signaling in cancer, it is important to investigate genomic  
76 alterations alongside transcriptional regulation of *all* genes associated with Wnt signaling in a  
77 comparative approach. We hypothesize that pan-cancer transcriptional aberrations in Wnt  
78 signaling is caused by genomic amplifications of a group of genes known as Wnt drivers and  
79 that transcriptional profiles of driver genes are important predictors of patient outcome. We  
80 conducted a pan-cancer analysis on 147 Wnt signaling genes, which involved positive and  
81 negative regulators of the pathway alongside their downstream targets. We analyzed 18,484  
82 matched genomic and transcriptomic profiles representing 21 cancer types to determine  
83 whether 1) somatic copy number amplifications are drivers of hyperactive Wnt signaling, 2)  
84 Wnt driver genes harbor clinically relevant prognostic information and 3) crosstalk exists  
85 between Wnt driver genes, tumor hypoxia and signaling pathways associated with stem cell  
86 function. We demonstrate that overexpression of Wnt driver genes resulted in significantly  
87 poorer survival outcomes in six cancer types involving 3,050 patients. Hyperactivation of Wnt

88 signaling is linked to loss of cell adhesion and molecular features of stemness. Overall, our  
89 findings would facilitate the development of improved therapies through the inhibition of Wnt  
90 driver genes in a stratified manner.

## 91 **Materials and Methods**

92

93 A total of 147 genes associated with active and inactive Wnt signaling were retrieved from  
94 the Kyoto Encyclopedia of Genes and Genomes (KEGG) database listed in Table S1.

95

### 96 **Study cohorts**

97 Genomic and transcriptomic profiles of 21 cancers were generated by The Cancer Genome  
98 Atlas (TCGA) initiative<sup>22</sup> (n=18,484) (Table S2). For transcriptomic profiles, we retrieved  
99 Illumina HiSeq rnaseqv2 Level 3 RSEM normalized data from the Broad Institute GDAC Firehose  
100 website. For somatic copy number alterations analyses, we retrieved GISTIC datasets<sup>23</sup> using  
101 the RCGAToolbox package to access Firehose Level 4 copy number variation data. Level 4  
102 clinical data were retrieved using RCGAToolbox for survival analyses.

103

### 104 **Somatic copy number alterations analyses**

105 GISTIC gene-level table provided discrete amplification and deletion indicators for all tumor  
106 samples. Amplified genes were denoted as positive numbers: '1' represents amplification  
107 above the threshold or low-level gain (1 extra copy) while '2' represents high-level  
108 amplification (2 or more extra copies). Deletions were denoted as negative values: '-1'  
109 represents heterozygous deletion while '-2' represents homozygous deletion.

110

### 111 **Determining the 16-gene scores and hypoxia scores**

112 16-Wnt-gene scores for each patient were determined from the mean log<sub>2</sub> expression values  
113 of 16 genes: *WNT2*, *WNT3*, *WNT3A*, *WNT10B*, *FZD2*, *FZD6*, *FZD10*, *DVL3*, *WISP1*, *TBL1XR1*,  
114 *RUVBL1*, *MYC*, *CCND1*, *CAMK2B*, *RAC3* and *PRKCG*. Hypoxia scores were computed from the

115 mean  $\log_2$  expression values of 52 hypoxia signature genes<sup>24</sup>. For analyses in Figures 5 and 7,  
116 patients were separated into four groups using median 16-gene scores and median hypoxia  
117 scores or median *EZH2* expression values as thresholds. Nonparametric Spearman's rank-order  
118 correlation tests were employed to investigate the relationship between 16-gene scores and  
119 hypoxia scores or *EZH2* expression values.

120

### 121 **Differential expression analyses**

122 To compare Wnt gene expression between tumor and non-tumor samples, gene expression  
123 profiles for both sample types were separated into two files based on TCGA barcode  
124 information. RSEM expression values were converted to  $\log_2(x + 1)$  scale. To compare changes  
125 in gene expression between high- and low-score groups, patients were median dichotomized  
126 based on their 16-gene scores in each cancer type. Differential expression analyses were  
127 performed using the R limma package employing the linear model and Bayes method. P value  
128 adjustments were conducted using the Benjamini-Hochberg false discovery rate method.

129

### 130 **Biological enrichment and transcription factor analyses**

131 To ascertain which biological pathways and signaling processes were significantly enriched as  
132 a result of Wnt hyperactivation, differentially expressed genes obtained from comparing high-  
133 and low-score patients were mapped against the KEGG and Gene ontology (GO) databases  
134 using GeneCodis<sup>25</sup>. Differentially expressed genes were also mapped against the Reactome  
135 database<sup>26</sup>. The Enrichr tool was used to determine whether differentially expressed genes  
136 were enriched with binding targets of stem cell-associated transcription factors<sup>27,28</sup>. Genes  
137 were mapped against the ChEA and ENCODE databases using Enrichr.

138



## 139 Survival analysis

140 The R survminer and survival packages were used for Kaplan-Meier and Cox proportional  
141 hazards regression analyses to determine if the expression levels of the 16 signature genes  
142 were significantly associated with overall survival. The ability of the 16-gene signature to  
143 predict overall survival when used in combination with hypoxia scores or *EZH2* expression  
144 levels was also examined. Univariate Cox regression analyses were performed on each of the  
145 individual 16 genes in 20 cancer types (where survival information is available) to determine  
146 the contribution of each gene in predicting overall survival. Univariate analyses were also  
147 performed on the gene set as a signature (by taking the mean expression scores of the 16  
148 genes) to determine its ability in predicting overall survival. Multivariate Cox regression  
149 analyses were employed to demonstrate the independence of the signature to tumor staging  
150 parameters. Hazard ratios (HR) and confidence intervals were determined from Cox models  
151 where HR greater than one ( $P < 0.05$ ) indicated that a covariate was positively associated with  
152 even probability (increased hazard) and negatively linked to survival length. The non-significant  
153 relationship between scaled Schoenfeld residuals and time supported the proportional hazards  
154 assumption; this was tested using the R survival package. Kaplan-Meier analyses were  
155 employed to confirm results obtained from Cox regression. Patients were first median-  
156 separated into low- and high-score groups based on the expression of the 16 genes (detailed  
157 above) for Kaplan-Meier analyses. Statistical difference between high- and low-score patient  
158 groups was evaluated using the log-rank test. Receiver operating characteristic analyses were  
159 performed using the R survcomp package to assess the predictive performance (sensitivity and  
160 specificity) of the signature in relation to tumor stage. Area under the ROC curves (AUCs) were  
161 calculated using survcomp. AUC values can fall between 1 (perfect marker) and 0.5  
162 (uninformative marker).

163

164 All plots were generated using ggplot2 and pheatmap packages implemented in R<sup>29</sup>. The

165 InteractiVenn tool<sup>30</sup> was employed to generate the Venn diagram in Figure S2.

166 **Results**

167

168 **Pan-cancer genomic alterations of Wnt signaling lead to dysregulated transcriptional response**  
169 **in tumors**

170

171 A list of 147 genes involved in the Wnt signal transduction pathway was retrieved from the  
172 KEGG database (Table S1). They include genes in both canonical and non-canonical Wnt  
173 pathways along with their downstream targets. A literature search was conducted to manually  
174 curate these genes into two categories: 1) genes associated with active Wnt signaling (90  
175 genes) and 2) genes associated with repressed Wnt signaling (50 genes) (Fig. 1A). To  
176 systematically evaluate the extent of Wnt dysregulation across cancers, we analyzed genomic  
177 and transcriptomic datasets from 18,484 patients representing 21 cancer types<sup>22</sup>. To  
178 determine whether genomic alterations were present in the 147 genes, we evaluated the  
179 frequency of somatic copy number alterations across all 21 cancers.

180

181 Focusing on genomic amplifications that occurred in at least 20% of samples in each cancer  
182 type and amplification events that were present in at least one-third of cancer types (> 8  
183 cancers), we observed that 61 genes were recurrently amplified (Fig. 1B). Of these 61 genes,  
184 41 genes were associated with active Wnt signaling while 20 genes were linked to repressed  
185 Wnt signaling (Fig. 1A). Some of the most amplified genes found in at least 95% of cancer types  
186 included genes from both canonical (*FZD1*, *FZD9*, *WNT16*, *WNT2*, *SFRP4*, *CSNK2A1* and *RAC1*)  
187 and non-canonical Wnt pathways (*PLCB1*, *PLCB4*, *CAMK2B* and *NFATC2*) (Fig. 1B).

188

189 When comparing the frequency of Wnt gene amplifications between cancers, interesting  
190 associations were observed. Cancers that affect organ systems working together to perform a  
191 common function, i.e. gastrointestinal tract, exhibited similar patterns of genomic  
192 amplifications where most of the 61 genes were amplified in at least 20% of tumors.  
193 Hierarchical clustering on amplification frequencies using Euclidean distance metric revealed  
194 that gastrointestinal cancers of the colon (COAD), stomach (STAD), bile duct (CHOL) and liver  
195 (LIHC) were clustered together, implying that there was a significant degree of conservation in  
196 genetic aberration of Wnt signaling in these cancers (Fig. 1B). In contrast, cancers of the brain  
197 and central nervous system (GBMLGG and GBM) had the least number of amplified genes; 11  
198 and 12 genes respectively (Fig. 1B).

199

200 We reason that somatic amplification events that were linked with transcriptional  
201 overexpression could represent candidate Wnt drivers, given that positive correlation between  
202 RNA and DNA levels would imply a gain of function. We performed differential expression  
203 analyses on the 90 genes involved in active Wnt signaling (Table S1) using tumor and non-  
204 tumor samples from each cancer type (Table S2). We observed that 28 genes were  
205 overexpressed (fold change > 1.5) in at least 8 or more cancers. Of the 28 genes, we identified  
206 16 genes that were also recurrently amplified (Fig. 1A, B). These 16 genes were prioritized as  
207 core Wnt driver candidates representative of multiple tumors: *WNT2*, *WNT3*, *WNT3A*,  
208 *WNT10B*, *FZD2*, *FZD6*, *FZD10*, *DVL3*, *WISP1*, *TBL1XR1*, *RUVBL1*, *MYC*, *CCND1*, *CAMK2B*, *RAC3*  
209 and *PRKCG* (Fig. 1B).

210

211

212

## 213 Pan-cancer prognostic relevance of the newly identified core Wnt drivers

214

215 We rationalize that the gain of function of the core Wnt drivers could influence patient  
216 outcome. Univariate Cox proportional hazards regression analyses were performed on the  
217 transcriptional profiles of each of the 16 Wnt drivers on 20 cancers where survival information  
218 is available. A vast majority of the core Wnt driver genes were significantly associated with  
219 poor prognosis (hazard ratio [HR] above 1,  $P < 0.05$ ) (Fig. S1). Interestingly, there were variations  
220 in the number of prognostic genes between cancers. Esophageal cancer (ESCA) had no  
221 prognostic genes and only two genes were prognostic in sarcoma (SARC) and  
222 cholangiocarcinoma (CHOL). In contrast, clear cell renal cell carcinoma (KIRC) and the pan-  
223 kidney cohort (KIPAN) involving chromophobe renal cell, papillary renal cell and clear cell renal  
224 cell carcinoma had 13 and 10 prognostic genes respectively (Fig. S1). To determine whether  
225 core Wnt driver genes harbored prognostic information as a gene set, we calculated expression  
226 scores for each patient in each cancer type by taking the mean expression of the 16 Wnt  
227 drivers. Patients were subsequently median-dichotomized into low- and high-score groups for  
228 survival analyses. Remarkably, when the core Wnt drivers were considered as a gene signature,  
229 we observed that patients with high scores had significantly poorer survival rates in six cancer  
230 cohorts ( $n=3,050$ ): bladder ( $P=0.011$ ), colon ( $P=0.013$ ), head and neck ( $P=0.026$ ), pan-kidney  
231 ( $P < 0.0001$ ), clear cell renal cell ( $P < 0.0001$ ) and stomach ( $P=0.032$ ) (Fig. 2).

232

233 To determine whether the 16-Wnt-gene signature harbored independent prognostic value  
234 over current tumor, node and metastasis (TNM) staging system, the signature was evaluated  
235 on patients grouped according to tumor stage; early (stages 1 and/or 2), intermediate (stages  
236 2 and/or 3) and late (stages 3 and/or 4). Patients were first separated by tumor stage followed

237 by median-stratification based on their 16-gene scores into low- and high-score groups within  
238 each stage category. Regardless of tumor stage, the signature retained its predictive value  
239 where high-score patients consistently had higher risk of death: early stage (bladder:  $P=0.0043$ ,  
240 colon:  $P=0.03$ , head and neck:  $P=0.024$ , pan-kidney:  $P=0.045$ , clear cell renal cell:  $P=0.0008$  and  
241 stomach:  $P=0.036$ ), intermediate stage (colon:  $P=0.029$ , pan-kidney:  $P=0.012$ , clear cell renal  
242 cell:  $P=0.00031$  and stomach:  $P=0.028$ ) and late stage (pan-kidney:  $P=0.0014$ , clear cell renal  
243 cell:  $P=0.00032$  (Fig. 3). Taken together, this suggests that another level of patient stratification  
244 beyond that of TNM staging is afforded by the 16-gene signature, especially for patients with  
245 early stage cancer where tumors are more heterogeneous.

246

247 Multivariate Cox regression analyses were performed to further confirm that the 16-Wnt-gene  
248 signature was independent of TNM staging. Indeed, in all six cancer types, the signature  
249 remained prognostic when controlling for TNM stage (Table S3). High-score patients had  
250 significantly higher risk of death even when TNM stage was taken into account: bladder  
251 ( $HR=1.409$ ,  $P=0.015$ ), colon ( $HR=1.561$ ,  $P=0.018$ ), head and neck ( $HR=1.378$ ,  $P=0.036$ ), pan-  
252 kidney ( $HR=1.738$ ,  $P<0.0001$ ), clear cell renal cell ( $HR=2.146$ ,  $P<0.0001$ ) and stomach  
253 ( $HR=1.457$ ,  $P=0.035$ ) (Table S3).

254

255 We next employed the receiver operating characteristic (ROC) method to assess the predictive  
256 performance (specificity and sensitivity) of the 16-gene signature in determining 5-year overall  
257 survival rates. As revealed by the area under the ROC curves (AUCs), we confirmed that the  
258 signature had consistently outperformed TNM staging in all six cancers: bladder (AUC=0.707  
259 vs. AUC=0.626), colon (AUC=0.673 vs. AUC=0.652), head and neck (AUC=0.624 vs. AUC=0.606),  
260 pan-kidney (AUC=0.779 vs. AUC=0.717), clear cell renal cell (AUC=0.740 vs. AUC=0.717) and

261 stomach (AUC=0.754 vs. AUC=0.561) (Fig. 4). Importantly, when the signature was used as a  
262 combined model with TNM staging, we observed a further increase in AUC suggesting that the  
263 signature offered incremental predictive value: bladder (AUC=0.713), colon (AUC=0.723), head  
264 and neck (AUC=0.663), pan-kidney (AUC=0.833), clear cell renal cell (AUC=0.818) and stomach  
265 (AUC=0.757) (Fig. 4).

266

267

### 268 **Association of Wnt drivers with tumor hypoxia**

269

270 Poor vascularization in solid tumors results in tumor hypoxia that is frequently associated with  
271 very poor prognosis due to reduced effectiveness of chemotherapy and radiotherapy<sup>31</sup>.  
272 Furthermore, the stabilization of the hypoxia inducible factor (HIF) in hypoxic tumor  
273 microenvironments can promote metastasis and cancer progression leading to poor  
274 prognosis<sup>32-34</sup>. An emerging view on cancer stem cells postulates that hypoxic regions could  
275 serve as stem cell niches to provide an oxidative DNA damage-buffered zone for cancer stem  
276 cells<sup>35,36</sup>. Moreover, crosstalk between HIFs and stem cell signal transduction pathways (Wnt,  
277 Notch and *Oct4*) have been reported<sup>37,38</sup>. For instance, HIF-1 $\alpha$  can interact with  $\beta$ -catenin to  
278 promote stem cell adaptation in hypoxic conditions<sup>39</sup>.

279

280 Multiple evidence suggests that Wnt signaling may be influenced by the extent of hypoxia  
281 within the tumor microenvironment. We reason that hypoxia could further enhance Wnt  
282 signaling to allow cancer stem cells to persist, which together contribute to even poorer  
283 survival outcomes in patients. Integrating hypoxia information with the 16-Wnt-gene signature  
284 would enable the evaluation of the crosstalk between both pathways and its clinical relevance.

285 We predict that patients with more hypoxic tumors would have higher expression of Wnt  
286 driver genes, which may imply that these patients have higher proportions of tumor-initiating  
287 cells with hyperactive Wnt signaling. To assess tumor hypoxia levels, we utilized a  
288 computationally derived hypoxia gene signature comprising of 52 genes<sup>24</sup>. Hypoxia scores  
289 were calculated for each patient as the average expression of the 52 genes. Interestingly,  
290 significant positive correlations were observed between the 16-Wnt-gene scores and hypoxia  
291 scores in bladder ( $\rho=0.365$ ,  $P<0.0001$ ) and clear cell renal cell cancers ( $\rho=0.305$ ,  $P<0.0001$ ),  
292 suggesting that in these two cancers, hypoxic tumors had higher expression of core Wnt drivers  
293 (Fig. 5A).

294

295 To determine the clinical relevance of this positive association, we separated patients into four  
296 groups: 1) high scores for both 16-gene and hypoxia, 2) high 16-gene score and low hypoxia  
297 score, 3) low 16-gene score and high hypoxia score and 4) low scores for both 16-gene and  
298 hypoxia (Fig. 5A). Kaplan-Meier analyses were performed on the four patient groups and we  
299 observed that the combined relation of Wnt hyperactivation and hypoxia was significantly  
300 associated with overall survival in both cancers: bladder ( $P=0.009$ ) and clear cell renal cell  
301 ( $P<0.0001$ ) (Fig. 5B). Notably, patients with high hypoxia and high 16-gene scores had  
302 significantly higher mortality rates compared to those with low hypoxia and low 16-gene  
303 scores: bladder ( $HR=1.897$ ,  $P=0.0096$ ) and clear cell renal cell ( $HR=2.946$ ,  $P<0.0001$ ) (Fig. 5C).  
304 Overall, our results suggest that the joint effect of elevated hypoxia and Wnt signaling is linked  
305 to more aggressive disease states.

306

307 **Wnt hyperactivation is responsible for epithelial-to-mesenchymal transition properties**  
308 **through decreased cell adhesion**



309

310 Given the poor survival outcomes in patients with high 16-gene scores, we wanted to assess  
311 the biological consequences of hyperactive Wnt signaling. Patients were median-stratified into  
312 two categories, high- and low-score, for differential expression analyses. For each cancer, the  
313 number of differentially expressed genes ( $-1 > \log_2 \text{fold-change} > 1$ ,  $P < 0.05$ ) were 1,543  
314 (bladder), 1,164 (colon), 984 (head and neck), 659 (pan-kidney), 943 (clear cell renal cell) and  
315 328 (stomach) (Table S4) (Fig. S2). Gene ontology (GO) enrichment analyses revealed  
316 enrichment of biological processes consistent with those of cancer stem cells: cell proliferation,  
317 cell differentiation, embryo development and cell morphogenesis (Fig. 6A). Moreover, despite  
318 their diverse tissue origins, high-score patients from all six cancers exhibited remarkably similar  
319 biological alterations (Fig. 6A) (Table S4). For example, high-score patients appear to show a  
320 phenotype associated with loss of cell adhesion properties. Genes involved in regulating cell  
321 adhesion were downregulated and the 'cell adhesion' GO term was among the most enriched  
322 ontologies across all six cancers (Fig. 6A). As a further confirmation, differentially expressed  
323 genes were mapped to the KEGG database and enrichments of ontology related to cell  
324 adhesion molecules were similarly observed (Fig. 6B). A third database known as Reactome<sup>26</sup>  
325 was used in functional enrichment analyses. Comparing results from both KEGG and Reactome  
326 analyses revealed enrichments of additional processes related to oncogenesis and Wnt  
327 signaling; e.g. altered metabolism, PPAR signaling, MAPK signaling, TGF- $\beta$  signaling, Hedgehog  
328 signaling, calcium signaling, collagen synthesis and degradation, focal adhesion and chemokine  
329 signaling (Fig. 6B, C). Within the tumor microenvironment, collagen can modulate extracellular  
330 matrix conformation that could paradoxically promote tumor progression<sup>40,41</sup>. Indeed, we  
331 observed the enrichment of numerous collagen-related Reactome pathways: assembly of  
332 collagen fibrils, collagen biosynthesis, collagen formation, collagen chain trimerization and

333 collagen degradation (Fig. 6C). Overall, our results suggest that elevated mortality risks in high-  
334 score patients could potentially be due to loss of cell adhesion and aggravated disease states  
335 exacerbated by Wnt hyperactivation.

336

337 To determine the extent of the loss of adhesive properties in tumor cells expressing high levels  
338 of Wnt driver genes, we examined the expression profiles of 32 genes from the major cadherin  
339 superfamily. Major cadherins are a group of highly conserved proteins that encode at least five  
340 cadherin repeats, which include type I and II classical cadherins (*CDH1*, *CDH2*, *CDH3*, *CDH4*,  
341 *CDH5*, *CDH6*, *CDH7*, *CDH8*, *CDH9*, *CDH10*, *CDH11*, *CDH12*, *CDH13*, *CDH15*, *CDH18*, *CDH19*,  
342 *CDH20*, *CDH22*, *CDH24* and *CDH26*), 7D cadherins (*CDH16* and *CDH17*), desmosomal cadherins  
343 (*DSC1*, *DSC2*, *DSC3*, *DSG1*, *DSG2*, *DSG3* and *DSG4*) and CELSR cadherins (*CELSR1*, *CELSR2* and  
344 *CELSR3*)<sup>42</sup>. Spearman's correlation analyses between major cadherins and each of the  
345 individual Wnt driver genes revealed that the 16 genes exhibited a global pattern of negative  
346 correlation with major cadherins across all six cancer types (Fig. 6E). Taken together, these  
347 results provide further support to the notion on loss of cadherin-mediated cell adhesion in  
348 tumor cells with hyperactive Wnt signaling, which may act in concert to promote neoplastic  
349 progression.

350

351

## 352 **A role for *EZH2* histone methyltransferase in cancer stem cells**

353

354 When analyzing transcription factor (TF) binding to differentially expressed genes described in  
355 the previous section, we observed that these genes were enriched for targets of several  
356 notable TFs such as *EZH2*, *SUZ12*, *Nanog*, *Sox2* and *Smad4* (Fig. 6D). *Sox2* and *Nanog* are well-

357 known stem cell markers<sup>43</sup> while EZH2 and SUZ12 are part of the polycomb repressive complex  
358 2 responsible for epigenetic regulation during embryonic development<sup>44,45</sup> (Fig. 6D). The  
359 enrichment of target genes of these TFs supports the hypothesis that Wnt hyperactivation is  
360 associated with cancer stem cell properties. Aberrations in *EZH2* and *SUZ12* have been linked  
361 to cancer progression<sup>46–50</sup> and overexpression of *EZH2* is associated with poor prognosis<sup>51</sup>.  
362 Direct crosstalk between *EZH2* function and Wnt signaling has been reported where *EZH2* was  
363 shown to inhibit Wnt pathway antagonists to activate Wnt/ $\beta$ -catenin signaling leading to  
364 increased cellular proliferation<sup>52</sup>. Moreover, *EZH2* inhibits E-cadherin expression via lncRNA  
365 H19 to promote bladder cancer metastasis<sup>53</sup>.

366

367 Since EZH2 binding targets were enriched among differentially expressed genes (confirmed by  
368 both ChEA and ENCODE databases) and given the role of EZH2 in cell adhesion and Wnt  
369 signaling, we reason that *EZH2* would be overexpressed in tumors with hyperactive Wnt  
370 signaling. Indeed, significant positive correlations were observed between 16-Wnt-gene scores  
371 and *EZH2* expression in renal cancers: pan-kidney ( $\rho=0.203$ ,  $P<0.0001$ ) and clear cell renal  
372 cell ( $\rho=0.233$ ,  $P<0.0001$ ) (Fig. 7A). Patients were further grouped by their 16-gene scores and  
373 *EZH2* expression profiles into four categories: 1) high 16-gene score and high *EZH2* expression,  
374 2) high 16-gene score and low *EZH2* expression, 3) low 16-gene score and high *EZH2* expression  
375 and 4) low 16-gene score and low *EZH2* expression (Fig. 7A). Interestingly, patients with high  
376 16-gene score that concurrently had high *EZH2* expression had the poorest survival outcomes  
377 compared to the others: pan-kidney ( $P<0.0001$ ) and clear cell renal cell ( $P<0.0001$ ) (Fig. 7B).  
378 This suggests that Wnt hyperactivation and *EZH2* overexpression could synergize to drive  
379 tumor progression resulting in significantly higher death risks: pan-kidney (HR=3.444,  
380  $P<0.0001$ ) and clear cell renal cell (HR=3.633,  $P<0.0001$ ) (Fig. 7C).

## 381 Discussion and Conclusion

382

383 We performed a comprehensive pan-cancer analysis of 147 Wnt pathway genes in 18,484  
384 patients from 21 different cancer types to unravel the intricacies of Wnt regulation of cancer  
385 phenotypes. Taking into account genomic, transcriptomic and clinical data, we demonstrated  
386 that overexpression of Wnt genes is underpinned by somatically acquired gene amplifications  
387 (Fig. 1). We found that differential Wnt activation contributed to significant heterogeneity in  
388 disease progression and survival outcomes. Focusing on 16 core Wnt drivers that were  
389 recurrently amplified and overexpressed, our results confirmed that Wnt hyperactivation  
390 drove malignant progression that is conserved across diverse cancer types (Fig. 2, 3, 4). Our  
391 newly developed 16-Wnt-gene signature could predict patients with more aggressive disease  
392 states who may benefit from treatment with small molecule inhibitors of Wnt<sup>16,54,55</sup>.

393

394 Copy number amplification and concomitant overexpression of WNT driver genes in bladder,  
395 colon, head and neck, renal and stomach cancers were significantly associated with stem cell-  
396 like molecular features (Fig. 6). The transcriptional profiles of 16 Wnt drivers were negatively  
397 correlated with the expression of a vast majority of major cadherin genes involved cell  
398 adhesion; a process that may drive epithelial-to-mesenchymal transition (EMT)<sup>56</sup>(Fig. 6E). This  
399 is consistent with the role of Wnts as inducers of EMT<sup>57</sup>. Patients with high expression of Wnt  
400 driver genes exhibited enriched biological processes involving cytokine, TGF- $\beta$  and Hedgehog  
401 signaling (Fig. 6); these components are also implicated in regulating EMT induction<sup>57</sup>. TGF- $\beta$   
402 activation orchestrates signaling events activating downstream effectors such as Smad  
403 proteins that play essential roles in cellular differentiation<sup>58</sup>. Indeed, we observed that  
404 dysregulated genes in tumors with hyperactive Wnt signaling were enriched for Smad4 targets

405 (Fig. 6D). Smads can bind to Zeb proteins to repress E-cadherin expression during the onset of  
406 EMT<sup>59,60</sup>. The downregulation of major cadherins in tumors expressing high levels of Wnt  
407 drivers (Fig. 6E) could thus be a combined result of aberrant Wnt and TGF- $\beta$  signaling.

408

409 Patients with Wnt hyperactivation exhibited additional molecular features of undifferentiated  
410 cancer stem cells. We observed enrichments of stem cell-related TFs such as Nanog, Sox2 and  
411 polycomb proteins (SUZ12 and EZH2) as upstream targets of Wnt-associated dysregulated  
412 genes; this pattern was consistent across the different cancer types (Fig. 6D). Patients with  
413 Wnt hyperactivation phenotypes could have poorly differentiated tumors reminiscent of  
414 cancer stem cells given their preferential misexpression of genes normally associated with  
415 embryonic stem cell function (Fig. 7). The distinction between cancer stem cells and normal  
416 stem cells is of paramount interest. Molecular footprints of stemness identified from analyzing  
417 the transcriptional changes between high- and low-16-WNT-gene-score patients could provide  
418 additional evidence of cancer stem cell identity in these tumors that is linked to poor overall  
419 prognosis.

420

421 Our results also demonstrated that Wnt signaling is positively correlated with tumor hypoxia  
422 in bladder and clear cell renal cell cancers. Patients with more hypoxic tumors had higher 16-  
423 Wnt-gene scores, suggesting that tumor hypoxia may contribute to the activation of Wnt  
424 genes. These patients could benefit from the use of hypoxia-modifying drugs such as carbogen  
425 and nicotinamide shown to be effective in bladder cancer<sup>61</sup> to reduce tumor hypoxia, which  
426 may consequently dampen Wnt signaling. Crosstalk between Wnt signaling and hypoxia has  
427 been demonstrated in multiple cancers.  $\beta$ -catenin expression is induced by hypoxia in liver  
428 cancer, which contributes to increased EMT, invasion and metastasis<sup>62</sup>. Overexpression of HIF-

429 1 $\alpha$  promoted invasive potential of prostate cancer cells through  $\beta$ -catenin induction, while the  
430 silencing of  $\beta$ -catenin in HIF-1 $\alpha$  expressing cells resulted in increased and reduced epithelial  
431 marker and mesenchymal marker expression respectively<sup>63</sup>. Hypoxia-induced EMT is further  
432 enhanced by the addition of recombinant Wnt3a or is repressed by inhibiting  $\beta$ -catenin<sup>64</sup>.  
433 Indeed, our results confirmed that increased expression of Wnt driver genes was associated  
434 with a global downregulation of major cadherin genes consistent across six cancer types, which  
435 may occur through hypoxia-mediated processes (Fig. 6E). We observed that in clear cell renal  
436 cell carcinoma, patients with more hypoxic tumors who also had higher Wnt signature scores  
437 concomitant with a 2.9-fold higher risk of death (Fig. 5C). Interestingly, renal cancers have a  
438 high incidence of VHL mutations<sup>65</sup>. VHL is a protein involved in proteasomal degradation of  
439 HIF-1 $\alpha$ <sup>66</sup>. VHL antagonizes the Wnt pathway through  $\beta$ -catenin inhibition in renal tumors<sup>67</sup>,  
440 meaning that VHL mutations would derepress Wnt signaling and create a pseudohypoxic  
441 environment to further promote the expression of Wnt pathway genes. Our results will open  
442 up new research avenues for investigating the role of the 16 Wnt drivers and potential  
443 crosstalk with VHL-mediated HIF signaling in renal cancer.

444

445 In summary, we identified Wnt pathway genes that were recurrently amplified and  
446 overexpressed across 21 diverse cancer types. A core set of 16 genes known as Wnt drivers  
447 were preferentially expressed in high-grade tumors linking to poor overall survival. This  
448 signature is a prognostic indicator in six cancer types involving 3,050 patients and is  
449 independent and superior to tumor staging parameters, providing additional resolution for  
450 patient stratification within similarly staged tumors. We demonstrated clinically relevant  
451 relationships between the 16-gene signature, cancer stem cells, cell adhesion, tumor hypoxia  
452 and *EZH2* expression. Hence, aggressive tumor behavior and survival outcomes are, in part,

453 driven by Wnt hyperactivation. Furthermore, we reported evidence for crosstalk between Wnt  
454 signaling and other embryonic stem cell pathways (TGF- $\beta$  signaling, Nanog, Sox2 and polycomb  
455 repressive complex 2) confirming that these pathways do not operate in isolation and that  
456 interactions between them could add to the complexity of neoplastic progression. Prospective  
457 validation in clinical trials and additional functional studies on individual Wnt drivers are  
458 needed before they can be harnessed for therapeutic intervention.

459 **Funding.** None.

460

461 **Authors contribution.** WHC and AGL designed the study, analyzed the data and interpreted the

462 data. AGL supervised the research. WHC and AGL wrote the initial manuscript draft. AGL

463 revised the manuscript draft and approved the final version.



470 References

471

472 1. Reya T, Morrison SJ, Clarke MF, Weissman IL. Stem cells, cancer, and cancer stem cells.

473 *Nature*. 2001;414(6859):105.

474 2. Visvader JE, Lindeman GJ. Cancer stem cells in solid tumours: accumulating evidence

475 and unresolved questions. *Nat Rev cancer*. 2008;8(10):755.

476 3. Taipale J, Beachy P a. The Hedgehog and Wnt signalling pathways in cancer. *Nature*.

477 2001;411(May):349-354. doi:10.1038/35077219.

478 4. Reya T, Clevers H. Wnt signalling in stem cells and cancer. *Nature*.

479 2005;434(7035):843.

480 5. Cadigan KM, Nusse R. Wnt signaling: a common theme in animal development. *Genes*

481 *Dev*. 1997;11(24):3286-3305.

482 6. Angers S, Moon RT. Proximal events in Wnt signal transduction. *Nat Rev Mol cell Biol*.

483 2009;10(7):468.

484 7. van Es JH, Jay P, Gregorieff A, et al. Wnt signalling induces maturation of Paneth cells

485 in intestinal crypts. *Nat Cell Biol*. 2005;7(4):381.

486 8. Andrade AC, Nilsson O, Barnes KM, Baron J. Wnt gene expression in the post-natal

487 growth plate: regulation with chondrocyte differentiation. *Bone*. 2007;40(5):1361-

488 1369.

489 9. Clevers H. Wnt/ $\beta$ -catenin signaling in development and disease. *Cell*. 2006;127(3):469-

490 480.

491 10. Nusse R. Wnt signaling in disease and in development. *Cell Res*. 2005;15(1):28.

492 11. Satoh S, Daigo Y, Furukawa Y, et al. AXIN1 mutations in hepatocellular carcinomas, and

493 growth suppression in cancer cells by virus-mediated transfer of AXIN1. *Nat Genet*.

- 494 2000;24(3):245.
- 495 12. Suzuki H, Watkins DN, Jair K-W, et al. Epigenetic inactivation of SFRP genes allows  
496 constitutive WNT signaling in colorectal cancer. *Nat Genet.* 2004;36(4):417.
- 497 13. Kim MS, Kim SS, Ahn CH, Yoo NJ, Lee SH. Frameshift mutations of Wnt pathway genes  
498 AXIN2 and TCF7L2 in gastric carcinomas with high microsatellite instability. *Hum*  
499 *Pathol.* 2009;40(1):58-64.
- 500 14. Martiny-Baron V, Valencia A, Agirre X, et al. Epigenetic regulation of the non-canonical Wnt  
501 pathway in acute myeloid leukemia. *Cancer Sci.* 2010;101(2):425-432.
- 502 15. Takebe N, Harris PJ, Warren RQ, Ivy SP. Targeting cancer stem cells by inhibiting Wnt,  
503 Notch, and Hedgehog pathways. *Nat Rev Clin Oncol.* 2011;8(2):97.
- 504 16. Emami KH, Nguyen C, Ma H, et al. A small molecule inhibitor of  $\beta$ -catenin/cyclic AMP  
505 response element-binding protein transcription. *Proc Natl Acad Sci.*  
506 2004;101(34):12682-12687.
- 507 17. He B, Reguart N, You L, et al. Blockade of Wnt-1 signaling induces apoptosis in human  
508 colorectal cancer cells containing downstream mutations. *Oncogene.*  
509 2005;24(18):3054.
- 510 18. You L, He B, Xu Z, et al. An anti-Wnt-2 monoclonal antibody induces apoptosis in  
511 malignant melanoma cells and inhibits tumor growth. *Cancer Res.* 2004;64(15):5385-  
512 5389.
- 513 19. Tissier F, Cavard C, Groussin L, et al. Mutations of  $\beta$ -catenin in adrenocortical tumors:  
514 activation of the Wnt signaling pathway is a frequent event in both benign and  
515 malignant adrenocortical tumors. *Cancer Res.* 2005;65(17):7622-7627.
- 516 20. White BD, Chien AJ, Dawson DW. Dysregulation of Wnt/ $\beta$ -catenin signaling in  
517 gastrointestinal cancers. *Gastroenterology.* 2012;142(2):219-232.

- 518 21. Gonzalez-Sancho JM, Aguilera O, Garcia JM, et al. The Wnt antagonist DICKKOPF-1  
519 gene is a downstream target of  $\beta$ -catenin/TCF and is downregulated in human colon  
520 cancer. *Oncogene*. 2005;24(6):1098.
- 521 22. Weinstein JN, Collisson EA, Mills GB, et al. The cancer genome atlas pan-cancer  
522 analysis project. *Nat Genet*. 2013;45(10):1113.
- 523 23. Mermel CH, Schumacher SE, Hill B, Meyerson ML, Beroukhi R, Getz G. GISTIC2.0  
524 facilitates sensitive and confident localization of the targets of focal somatic copy-  
525 number alteration in human cancers. *Genome Biol*. 2011;12(4):R41.
- 526 24. Buffa FM, Harris AL, West CM, Miller CJ. Large meta-analysis of multiple cancers  
527 reveals a common, compact and highly prognostic hypoxia metagene. *Br J Cancer*.  
528 2010;102(2):428-435. doi:10.1038/sj.bjc.6605450.
- 529 25. Tabas-Madrid D, Nogales-Cadenas R, Pascual-Montano A. GeneCodis3: a non-  
530 redundant and modular enrichment analysis tool for functional genomics. *Nucleic  
531 Acids Res*. 2012;40(W1):W478--W483.
- 532 26. Croft D, Mundo AF, Haw R, et al. The Reactome pathway knowledgebase. *Nucleic Acids  
533 Res*. 2013;42(D1):D472--D477.
- 534 27. Kuleshov M V, Jones MR, Rouillard AD, et al. Enrichr: a comprehensive gene set  
535 enrichment analysis web server 2016 update. *Nucleic Acids Res*. 2016;44(W1):W90--  
536 W97.
- 537 28. Chen EY, Tan CM, Kou Y, et al. Enrichr: interactive and collaborative HTML5 gene list  
538 enrichment analysis tool. *BMC Bioinformatics*. 2013;14(1):128.
- 539 29. Wickham H. *Ggplot2: Elegant Graphics for Data Analysis*. Springer-Verlag New York;  
540 2016. <http://ggplot2.org>.
- 541 30. Heberle H, Meirelles GV, da Silva FR, Telles GP, Minghim R. InteractiVenn: a web-based

- 542 tool for the analysis of sets through Venn diagrams. *BMC Bioinformatics*.  
543 2015;16(1):169.
- 544 31. Semenza GL. Hypoxia-inducible factors: mediators of cancer progression and targets  
545 for cancer therapy. *Trends Pharmacol Sci*. 2012;33(4):207-214.
- 546 32. Lu X, Kang Y. Hypoxia and hypoxia-inducible factors (HIFs): master regulators of  
547 metastasis. *Clin cancer Res*. 2010:clincanres--1360.
- 548 33. Chang WH, Forde D, Lai AG. A novel signature derived from immunoregulatory and  
549 hypoxia genes predicts prognosis in liver and five other cancers. *J Transl Med*.  
550 2019;17(1):14. doi:10.1186/s12967-019-1775-9.
- 551 34. Chang WH, Forde D, Lai AG. Dual prognostic role for 2-oxoglutarate oxygenases in ten  
552 diverse cancer types: Implications for cell cycle regulation and cell adhesion  
553 maintenance. *bioRxiv*. 2018. doi:10.1101/442947.
- 554 35. Heddleston JM, Li Z, McLendon RE, Hjelmeland AB, Rich JN. The hypoxic  
555 microenvironment maintains glioblastoma stem cells and promotes reprogramming  
556 towards a cancer stem cell phenotype. *Cell cycle*. 2009;8(20):3274-3284.
- 557 36. Mohyeldin A, Garzón-Muvdi T, Quiñones-Hinojosa A. Oxygen in stem cell biology: a  
558 critical component of the stem cell niche. *Cell Stem Cell*. 2010;7(2):150-161.
- 559 37. Keith B, Simon MC. Hypoxia-inducible factors, stem cells, and cancer. *Cell*.  
560 2007;129(3):465-472.
- 561 38. Holland JD, Klaus A, Garratt AN, Birchmeier W. Wnt signaling in stem and cancer stem  
562 cells. *Curr Opin Cell Biol*. 2013;25(2):254-264.
- 563 39. Kaidi A, Williams AC, Paraskeva C. Interaction between  $\beta$ -catenin and HIF-1 promotes  
564 cellular adaptation to hypoxia. *Nat Cell Biol*. 2007;9(2):210.
- 565 40. Provenzano PP, Inman DR, Eliceiri KW, et al. Collagen density promotes mammary

- 566 tumor initiation and progression. *BMC Med.* 2008;6(1):11.
- 567 41. Shintani Y, Maeda M, Chaika N, Johnson KR, Wheelock MJ. Collagen I promotes  
568 epithelial-to-mesenchymal transition in lung cancer cells via transforming growth  
569 factor- $\beta$  signaling. *Am J Respir Cell Mol Biol.* 2008;38(1):95-104.
- 570 42. Hulpiau P, Van Roy F. Molecular evolution of the cadherin superfamily. *Int J Biochem*  
571 *Cell Biol.* 2009;41(2):349-369.
- 572 43. Tay Y, Zhang J, Thomson AM, Lim B, Rigoutsos I. MicroRNAs to Nanog, Oct4 and Sox2  
573 coding regions modulate embryonic stem cell differentiation. *Nature.*  
574 2008;455(7216):1124.
- 575 44. Pasini D, Bracken AP, Hansen JB, Capillo M, Helin K. The polycomb group protein Suz12  
576 is required for embryonic stem cell differentiation. *Mol Cell Biol.* 2007;27(10):3769-  
577 3779.
- 578 45. Lee TI, Jenner RG, Boyer LA, et al. Control of developmental regulators by Polycomb in  
579 human embryonic stem cells. *Cell.* 2006;125(2):301-313.
- 580 46. Yoo KH, Hennighausen L. EZH2 methyltransferase and H3K27 methylation in breast  
581 cancer. *Int J Biol Sci.* 2012;8(1):59.
- 582 47. Varambally S, Dhanasekaran SM, Zhou M, et al. The polycomb group protein EZH2 is  
583 involved in progression of prostate cancer. *Nature.* 2002;419(6907):624.
- 584 48. Zingg D, Debbache J, Schaefer SM, et al. The epigenetic modifier EZH2 controls  
585 melanoma growth and metastasis through silencing of distinct tumour suppressors.  
586 *Nat Commun.* 2015;6:6051.
- 587 49. Fan Y, Shen B, Tan M, et al. TGF- $\beta$ -induced upregulation of malat1 promotes bladder  
588 cancer metastasis by associating with suz12. *Clin cancer Res.* 2014.
- 589 50. Li H, Cai Q, Wu H, et al. SUZ12 promotes human epithelial ovarian cancer by

- 590 suppressing apoptosis via silencing HRK. *Mol Cancer Res.* 2012.
- 591 51. Wagener N, Macher-Goeppinger S, Pritsch M, et al. Enhancer of zeste homolog 2  
592 (EZH2) expression is an independent prognostic factor in renal cell carcinoma. *BMC*  
593 *Cancer.* 2010;10(1):524.
- 594 52. Cheng ASL, Lau SS, Chen Y, et al. EZH2-mediated concordant repression of Wnt  
595 antagonists promotes  $\beta$ -catenin--dependent hepatocarcinogenesis. *Cancer Res.* 2011.
- 596 53. Luo M, Li Z, Wang W, Zeng Y, Liu Z, Qiu J. Long non-coding RNA H19 increases bladder  
597 cancer metastasis by associating with EZH2 and inhibiting E-cadherin expression.  
598 *Cancer Lett.* 2013;333(2):213-221.
- 599 54. Chen B, Dodge ME, Tang W, et al. Small molecule-mediated disruption of Wnt-  
600 dependent signaling in tissue regeneration and cancer. *Nat Chem Biol.* 2009;5(2):100.
- 601 55. Takahashi-Yanaga F, Kahn M. Targeting Wnt signaling: can we safely eradicate cancer  
602 stem cells? *Clin cancer Res.* 2010:432-1078.
- 603 56. Nelson WJ, Nusse R. Convergence of Wnt,  $\beta$ -catenin, and cadherin pathways. *Science*  
604 (80- ). 2004;303(5663):1483-1487.
- 605 57. Singh A, Settleman J. EMT, cancer stem cells and drug resistance: an emerging axis of  
606 evil in the war on cancer. *Oncogene.* 2010;29(34):4741.
- 607 58. Derynck R, Zhang YE. Smad-dependent and Smad-independent pathways in TGF- $\beta$   
608 family signalling. *Nature.* 2003;425(6958):577.
- 609 59. Comijn J, Berx G, Vermassen P, et al. The two-handed E box binding zinc finger protein  
610 SIP1 downregulates E-cadherin and induces invasion. *Mol Cell.* 2001;7(6):1267-1278.
- 611 60. Postigo AA, Depp JL, Taylor JJ, Kroll KL. Regulation of Smad signaling through a  
612 differential recruitment of coactivators and corepressors by ZEB proteins. *EMBO J.*  
613 2003;22(10):2453-2462.

- 614 61. Hoskin PJ, Rojas AM, Bentzen SM, Saunders MI. Radiotherapy with concurrent  
615 carbogen and nicotinamide in bladder carcinoma. *J Clin Oncol*. 2010;28(33):4912-  
616 4918.
- 617 62. Liu L, Zhu X-D, Wang W-Q, et al. Activation of  $\beta$ -catenin by hypoxia in hepatocellular  
618 carcinoma contributes to enhanced metastatic potential and poor prognosis. *Clin*  
619 *cancer Res*. 2010:432-1078.
- 620 63. Zhao J-H, Luo Y, Jiang Y-G, He D-L, Wu C-T. Knockdown of  $\beta$ -Catenin through shRNA  
621 cause a reversal of EMT and metastatic phenotypes induced by HIF-1 $\alpha$ . *Cancer Invest*.  
622 2011;29(6):377-382.
- 623 64. Zhang Q, Bai X, Chen W, et al. Wnt/ $\beta$ -catenin signaling enhances hypoxia-induced  
624 epithelial--mesenchymal transition in hepatocellular carcinoma via crosstalk with hif-  
625 1 $\alpha$  signaling. *Carcinogenesis*. 2013;34(5):962-973.
- 626 65. Gnarr JR, Tory K, Weng Y, et al. Mutations of the VHL tumour suppressor gene in  
627 renal carcinoma. *Nat Genet*. 1994;7(1):85.
- 628 66. Haase VH. The VHL/HIF oxygen-sensing pathway and its relevance to kidney disease.  
629 *Kidney Int*. 2006;69(8):1302-1307.
- 630 67. Chitalia VC, Foy RL, Bachschmid MM, et al. Jade-1 inhibits Wnt signalling by  
631 ubiquitylating  $\beta$ -catenin and mediates Wnt pathway inhibition by pVHL. *Nat Cell Biol*.  
632 2008;10(10):1208.
- 633

634 **Figure legends**

635

636 **Figure 1. Pan-cancer core drivers of Wnt signaling. (A)** Schematic diagram depicting the study  
637 design and the identification of core Wnt driver genes subsequently representing the 16-gene  
638 signature. A total of 147 Wnt signaling genes representing both canonical and non-canonical  
639 pathways alongside their downstream targets were obtained from the KEGG database. Genes  
640 were grouped into two categories depending on whether they were associated with active or  
641 inactive Wnt signaling. Somatic copy number variations in all 147 genes were determined in  
642 21 cancer types. A total of 61 genes were recurrently amplified in at least 20% of tumors in  
643 each cancer type. They included 41 genes associated with active Wnt signaling. Of the 41  
644 genes, 16 genes (core Wnt drivers) were upregulated in tumor compared to non-tumor  
645 samples in at least 8 cancer types. Cox proportional hazards regression and Kaplan-Meier  
646 analyses were performed using the 16-gene signature, which demonstrated its ability to  
647 predict overall survival in at least six cancer types: bladder, colon, head and neck, clear cell  
648 renal cell, papillary renal cell, chromophobe renal cell and stomach cancers (n=3,050).  
649 Associations of the 16-Wnt-gene signature with cancer stem cell features, tumor hypoxia and  
650 cell adhesion were investigated. Potential clinical applications of the signature were proposed.  
651 **(B)** Somatic amplification and differential expression profiles of 61 Wnt genes. Cumulative bar  
652 chart depicts the number of cancer types with at least 20% of tumors with somatic gains. The  
653 heatmap on the left shows the extent of genomic amplifications for each of the 61 genes  
654 separated into 'active' and 'inactive' Wnt signaling categories across 21 cancer types. Heatmap  
655 intensities indicate the fraction of the cohort in which a given gene is gained or amplified. The  
656 columns were ordered using hierarchical clustering with Euclidean distance metric to reveal  
657 cancers that have similar somatic amplification profiles. The heatmap on the right



658 demonstrates differential expression values ( $\log_2$ ) between tumor and non-tumor samples for  
659 each of the 61 genes. Genes marked in red represent the 16 Wnt driver genes. These are genes  
660 that were amplified in at least 20% of tumors in at least 8 cancers and genes that were  
661 overexpressed (fold-change > 1.5) in at least 8 cancers. Refer to Table S2 for cancer  
662 abbreviations.

663

664 **Figure 2. Survival analyses using the 16-Wnt-gene signature in six cancer cohorts.** Kaplan-Meier  
665 analyses of overall survival on patients stratified into high- and low-score groups using the 16-  
666 gene signature. P values were determined from the log-rank test.

667

668 **Figure 3. The 16-Wnt-gene signature is independent of TNM stage.** Kaplan-Meier analyses  
669 were performed on patients categorized according to tumor TNM stages that were further  
670 stratified using the 16-gene signature. The signature successfully identified patients at higher  
671 risk of death in all TNM stages. P values were determined from the log-rank test. TNM: tumor,  
672 node, metastasis.

673

674 **Figure 4. Predictive performance of the 16-Wnt-gene signature is superior to TNM staging.**  
675 Prediction of five-year overall survival was assessed using the receiver operating characteristic  
676 (ROC) analysis to determine specificity and sensitivity of the signature. ROC curves were  
677 generated based on the 16-gene signature, TNM stage and a combination of the signature and  
678 TNM stage. AUC: area under the curve. TNM: tumor, node, metastasis. TNM staging were in  
679 accordance with previous publications employing TCGA datasets<sup>33,34</sup>.

680

681

682 **Figure 5. Positive associations between the 16-gene signature and tumor hypoxia in bladder**  
683 **and clear cell renal cell cancers. (A)** Scatter plots show significant positive correlation between  
684 16-gene scores and hypoxia scores as determined by Spearman's rank-order correlation  
685 analyses. Patients were separated and color-coded into four categories based on median 16-  
686 gene and hypoxia scores. **(B)** Kaplan-Meier analyses were performed on the four patient  
687 categories to determine the effects of the combined relationship between hypoxia and the  
688 Wnt signature on overall survival. **(C)** Univariate Cox proportional hazards analysis of the  
689 relation between the 16-gene signature and hypoxia. CI: confidence interval.

690

691 **Figure 6. Wnt hyperactivation is associated with a cancer stem cell-like phenotype.** Patients  
692 were median separated into high- and low-score groups using the 16-gene signature for  
693 differential expression analyses. Enrichments of biological processes on differentially  
694 expressed genes were determined by mapping the genes to **(A)** Gene Ontology, **(B)** KEGG and  
695 **(C)** Reactome databases. Significantly enriched pathways or ontologies for all six cancer  
696 cohorts were depicted. **(D)** Differentially expressed genes were enriched for targets of stem  
697 cell-related transcription factors (Nanog, Sox2, Smad4, EZH2 and SUZ12) as confirmed by  
698 mapping to ENCODE and ChEA databases. Refer to Table S2 for cancer abbreviations. **(E)**  
699 Significant negative correlations between the expression profiles of individual Wnt driver  
700 genes and 32 major cadherin genes. Heatmaps were generated based on Spearman's  
701 correlation coefficient values.

702

703 **Figure 7. Positive associations between the 16-gene signature and *EZH2* expression in renal**  
704 **cancers. (A)** Scatter plots show significant positive correlation between 16-gene scores and  
705 *EZH2* expression as determined by Spearman's rank-order correlation analyses. Patients were

706 separated and color-coded into four categories based on median 16-gene score and *EZH2*  
707 expression. **(B)** Kaplan-Meier analyses were performed on the four patient categories to  
708 determine the effects of the combined relationship between *EZH2* expression and the Wnt  
709 signature on overall survival. **(C)** Univariate Cox proportional hazards analysis of the relation  
710 between the 16-gene signature and *EZH2* expression. CI: confidence interval.

711 **Supplementary figures and tables**

712

713 **Figure S1. Prognosis of each of the 16 signature genes in 20 cancer types as determined using**  
714 **Cox regression analyses.** Both columns (cancer types) and rows (Wnt genes) were ordered  
715 using hierarchical clustering (Euclidean distance metric). Grey boxes represent non-prognostic  
716 genes. Heatmap intensities represent hazard ratios of prognostic genes that were significant  
717 ( $P < 0.05$ ).

718

719 **Figure S2. Venn diagram depicts a six-way comparison of the differentially expressed genes**  
720 **identified from high-score versus low-score patients in all six cancer cohorts.** Numbers in  
721 parentheses represent the number of differentially expressed genes ( $-1 > \log_2 \text{fold-change} >$   
722  $1, P < 0.05$ ) in each cancer.

723

724 **Table S1.** List of 147 genes associated with Wnt signaling.

725

726 **Table S2.** Abbreviations and number of tumor and non-tumor samples in TCGA cancers.

727

728 **Table S3.** Univariate and multivariate Cox proportional hazards analysis of risk factors  
729 associated with overall survival in multiple cancers.

730

731 **Table S4.** Differentially expressed genes between high- and low 16-Wnt-score patient groups  
732 in six cancers.

# Figure 1

**A**

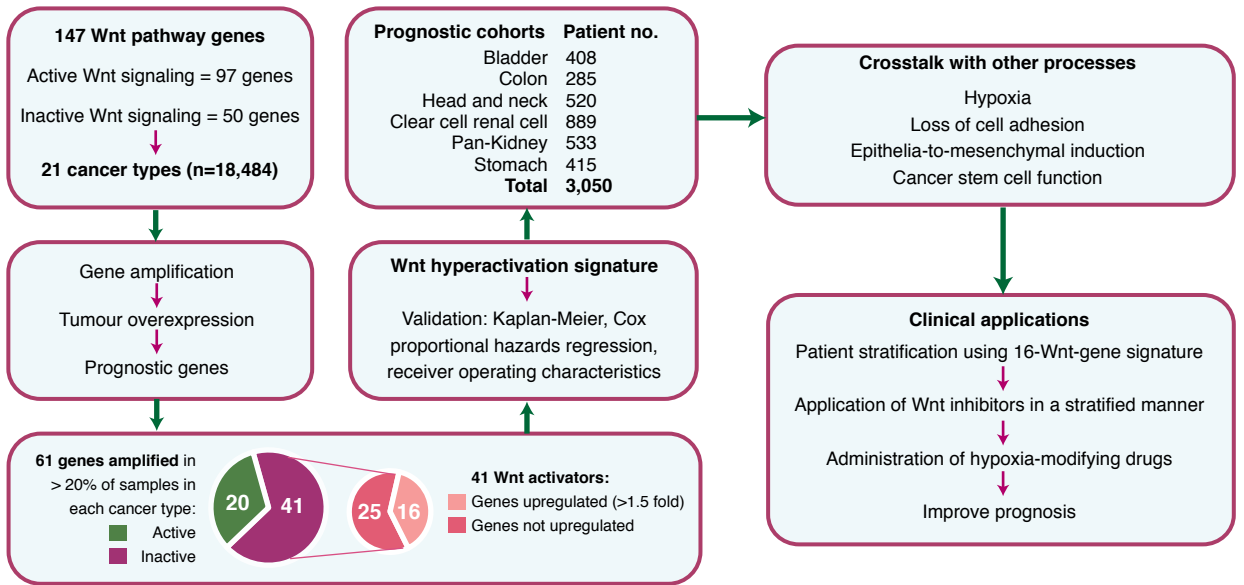

**B**

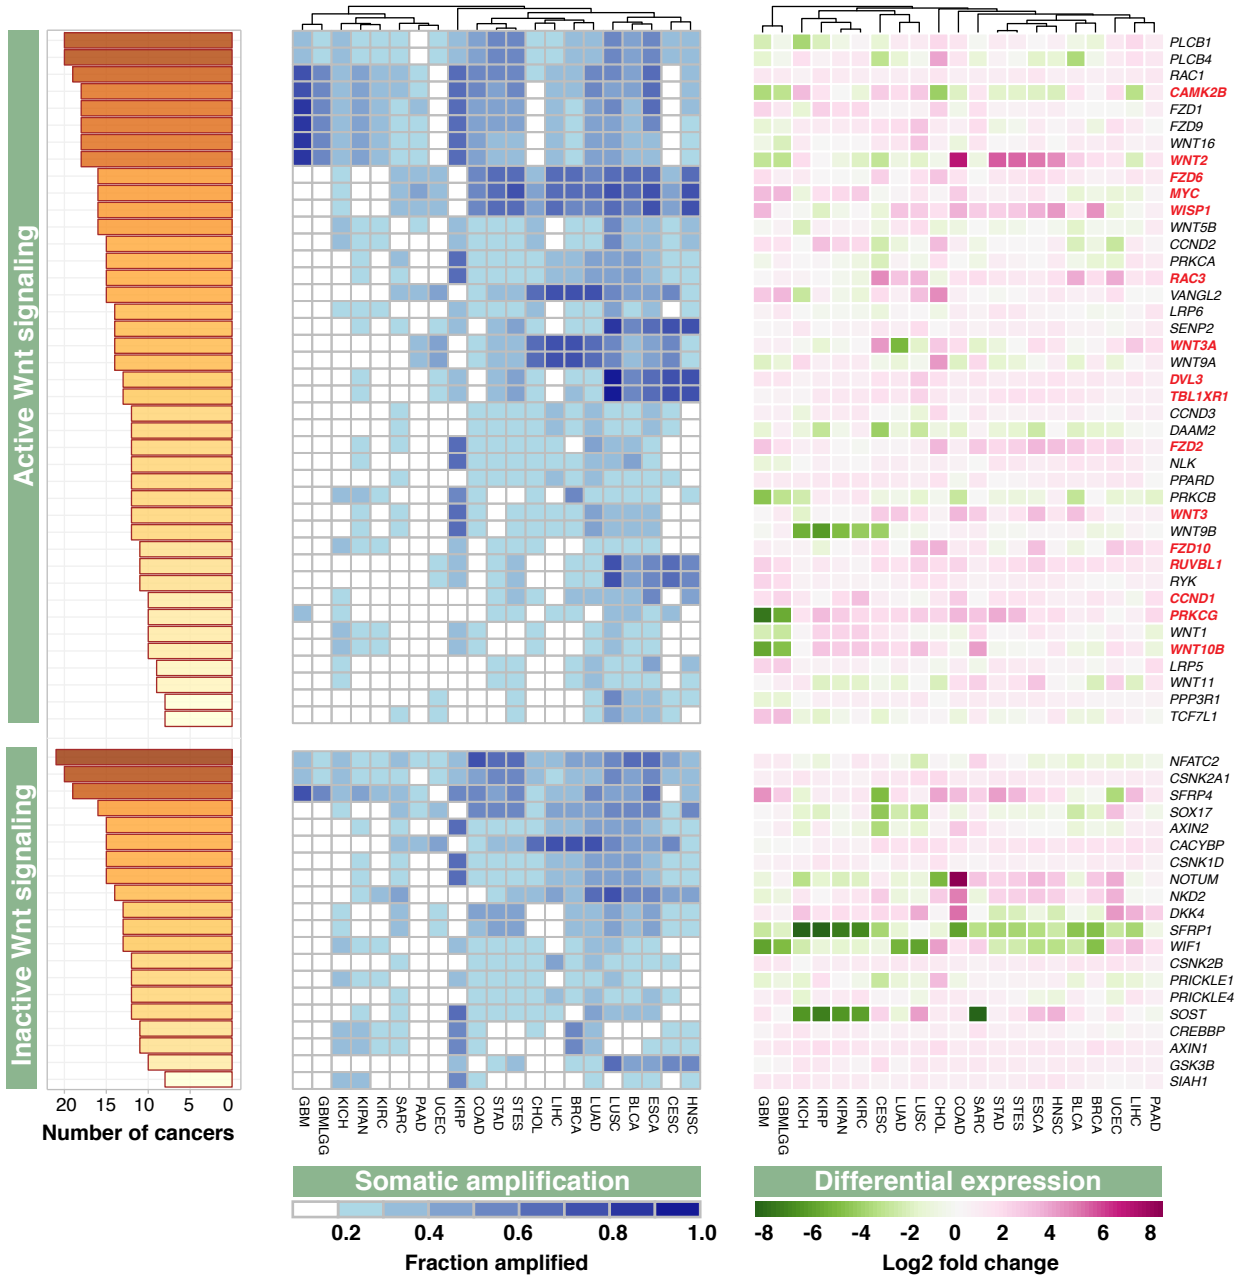

# Figure 2

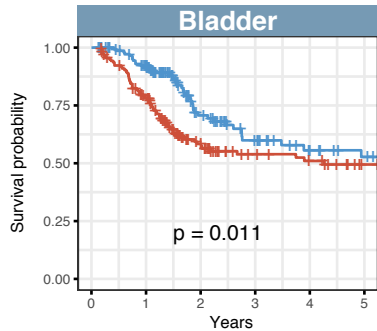

Number at risk

|            |     |     |    |    |    |    |
|------------|-----|-----|----|----|----|----|
| Low score  | 152 | 125 | 56 | 35 | 24 | 18 |
| High score | 158 | 115 | 59 | 39 | 34 | 24 |

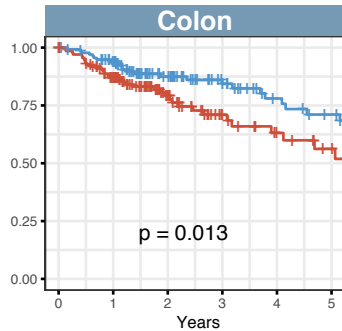

Number at risk

|            |     |     |    |    |    |    |
|------------|-----|-----|----|----|----|----|
| Low score  | 137 | 117 | 73 | 50 | 34 | 28 |
| High score | 136 | 106 | 55 | 29 | 20 | 14 |

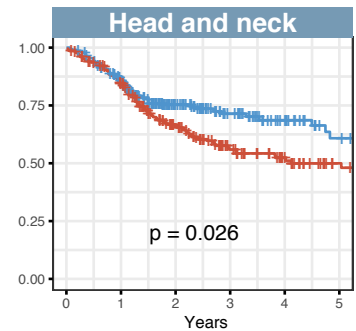

Number at risk

|            |     |     |     |    |    |    |
|------------|-----|-----|-----|----|----|----|
| Low score  | 220 | 174 | 97  | 62 | 39 | 22 |
| High score | 221 | 176 | 111 | 69 | 46 | 26 |

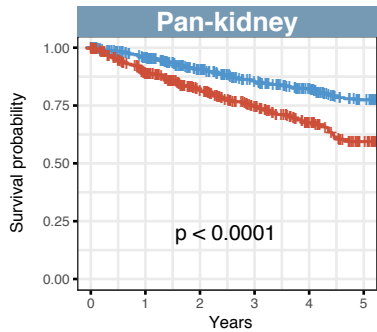

Number at risk

|            |     |     |     |     |     |     |
|------------|-----|-----|-----|-----|-----|-----|
| Low score  | 443 | 385 | 303 | 243 | 197 | 145 |
| High score | 444 | 351 | 262 | 197 | 144 | 98  |

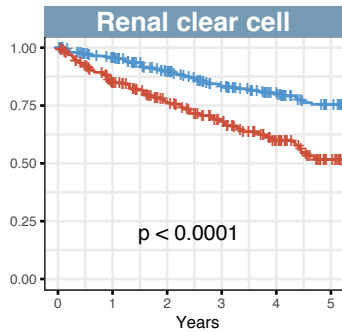

Number at risk

|            |     |     |     |     |     |    |
|------------|-----|-----|-----|-----|-----|----|
| Low score  | 262 | 231 | 191 | 158 | 128 | 97 |
| High score | 262 | 204 | 164 | 131 | 93  | 55 |

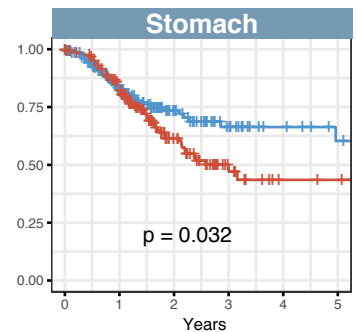

Number at risk

|            |     |     |    |    |    |    |
|------------|-----|-----|----|----|----|----|
| Low score  | 161 | 108 | 51 | 26 | 15 | 10 |
| High score | 160 | 118 | 48 | 17 | 6  | 5  |

**Figure 3**

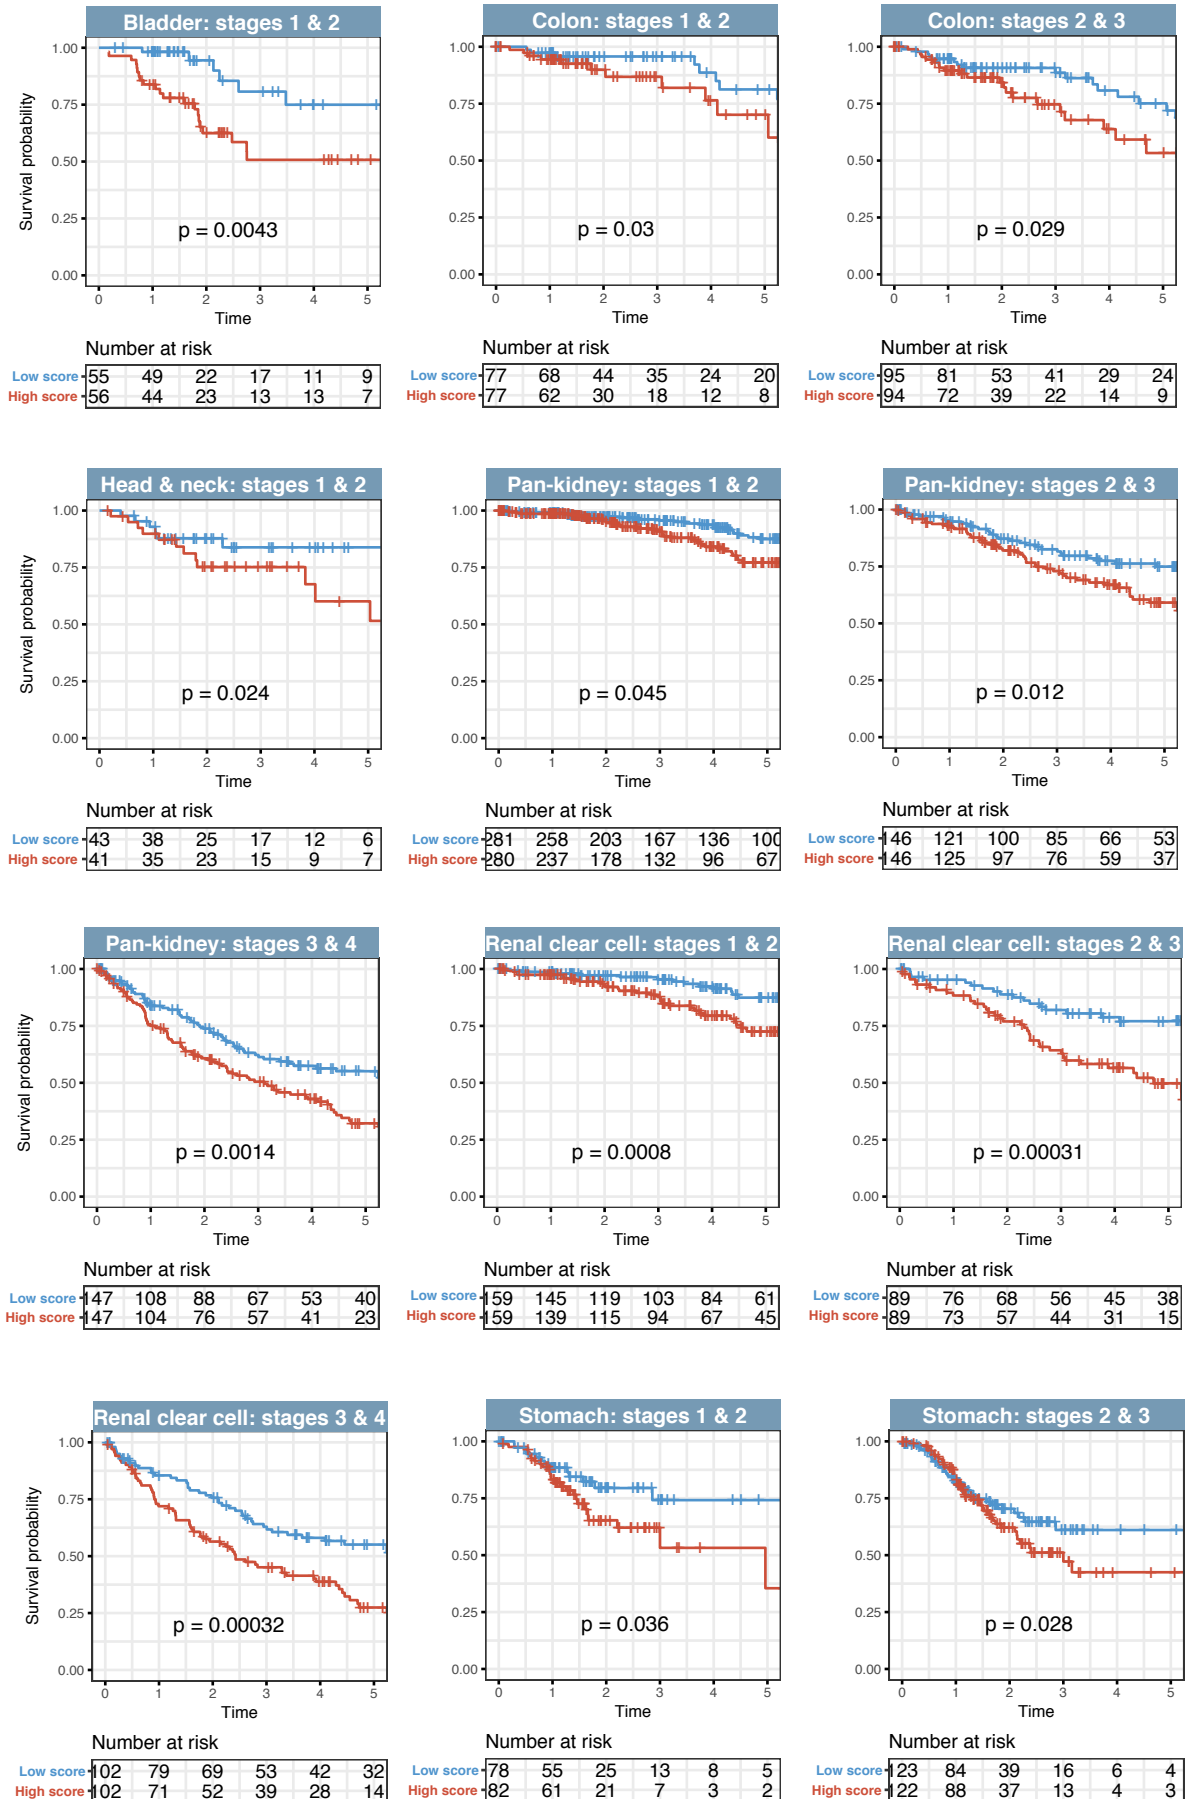

**Figure 4**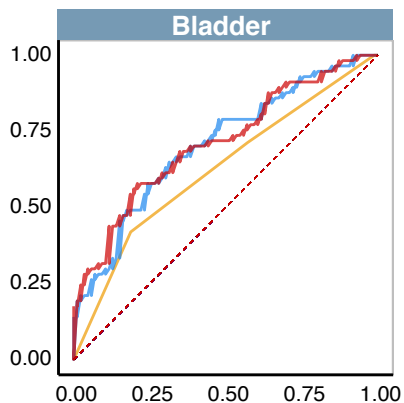

| Classifier      | AUC   |
|-----------------|-------|
| TNM             | 0.626 |
| Signature       | 0.707 |
| Signature + TNM | 0.713 |

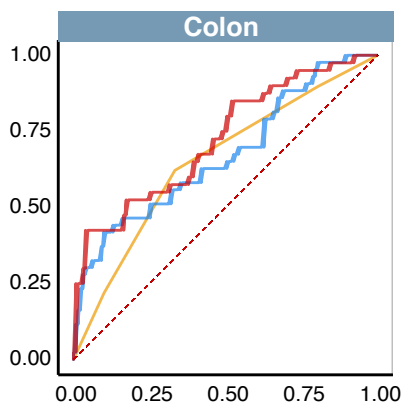

| Classifier      | AUC   |
|-----------------|-------|
| TNM             | 0.652 |
| Signature       | 0.673 |
| Signature + TNM | 0.723 |

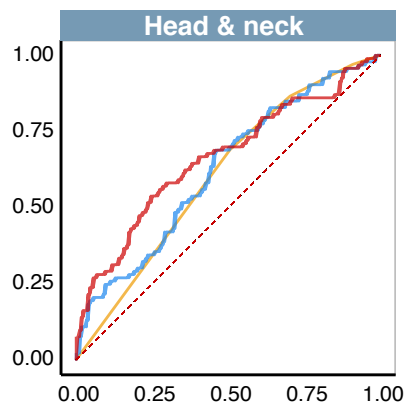

| Classifier      | AUC   |
|-----------------|-------|
| TNM             | 0.606 |
| Signature       | 0.624 |
| Signature + TNM | 0.663 |

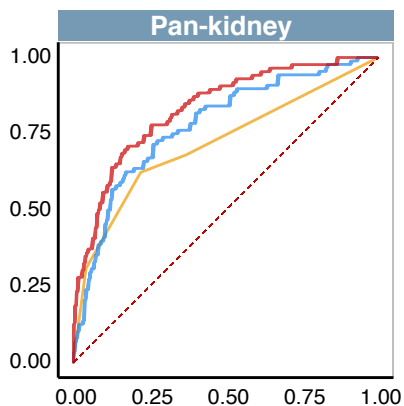

| Classifier      | AUC   |
|-----------------|-------|
| TNM             | 0.717 |
| Signature       | 0.779 |
| Signature + TNM | 0.833 |

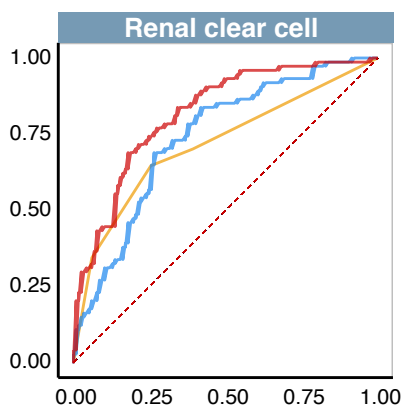

| Classifier      | AUC   |
|-----------------|-------|
| TNM             | 0.717 |
| Signature       | 0.740 |
| Signature + TNM | 0.818 |

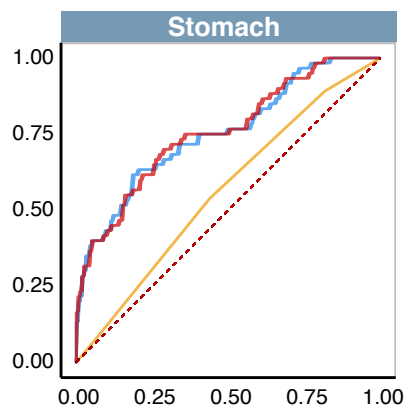

| Classifier      | AUC   |
|-----------------|-------|
| TNM             | 0.561 |
| Signature       | 0.754 |
| Signature + TNM | 0.757 |



**Figure 5**

**A**

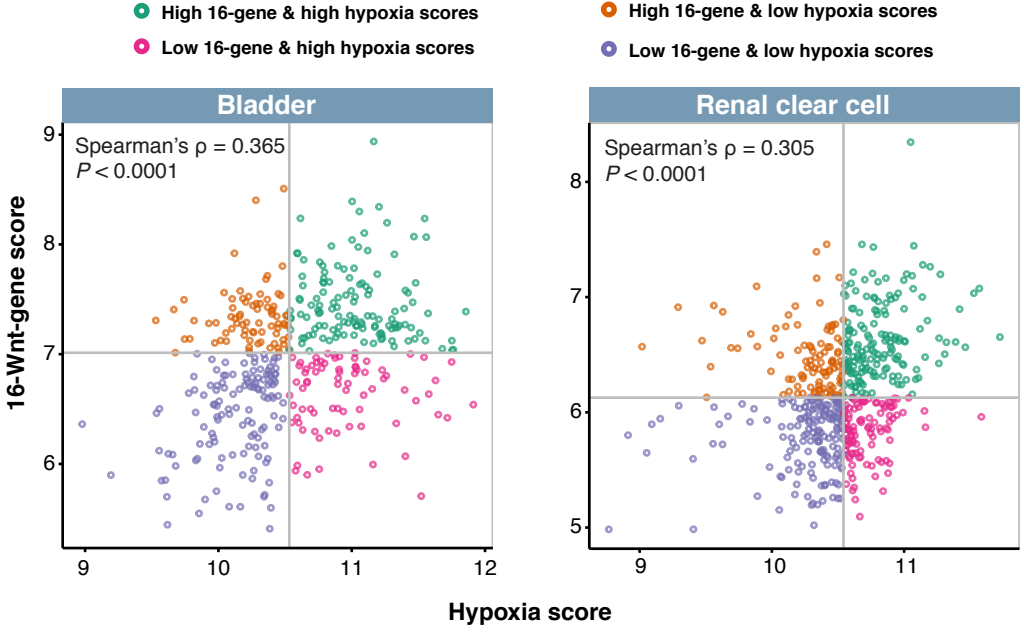

**B**

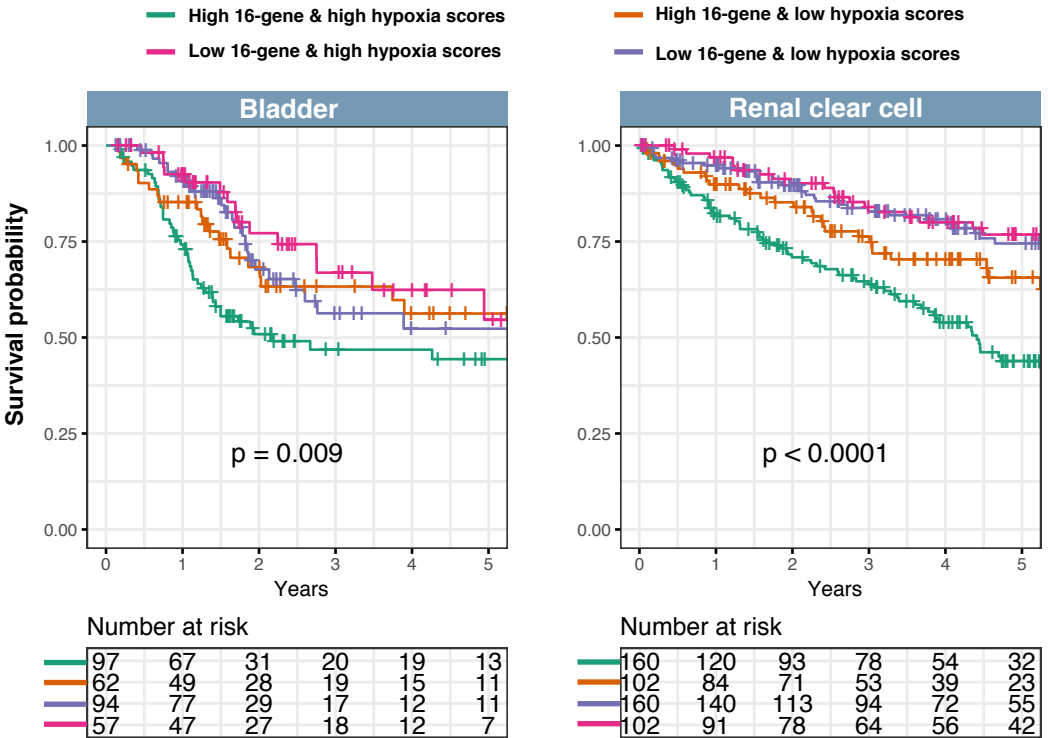

**C**

|                                                                                   | Hazard Ratio (95% CI) | P-value         |
|-----------------------------------------------------------------------------------|-----------------------|-----------------|
| <b>Bladder</b>                                                                    |                       |                 |
| High 16-gene score & high hypoxia score vs. low 16-gene score & low hypoxia score | 1.897 (1.168 - 3.079) | <b>0.0096</b>   |
| High 16-gene score & low hypoxia score vs. low 16-gene score & low hypoxia score  | 1.179 (0.664 - 2.095) | 0.57            |
| Low 16-gene score & high hypoxia score vs. low 16-gene score & low hypoxia score  | 0.859 (0.453 - 1.632) | 0.64            |
| <b>Clear cell renal cell</b>                                                      |                       |                 |
| High 16-gene score & high hypoxia score vs. low 16-gene score & low hypoxia score | 2.946 (1.972 - 4.399) | <b>1.29E-07</b> |
| High 16-gene score & low hypoxia score vs. low 16-gene score & low hypoxia score  | 1.690 (1.052 - 2.714) | <b>0.03</b>     |
| Low 16-gene score & high hypoxia score vs. low 16-gene score & low hypoxia score  | 1.040 (0.628 - 1.723) | 0.88            |

**Figure 6**

**A**

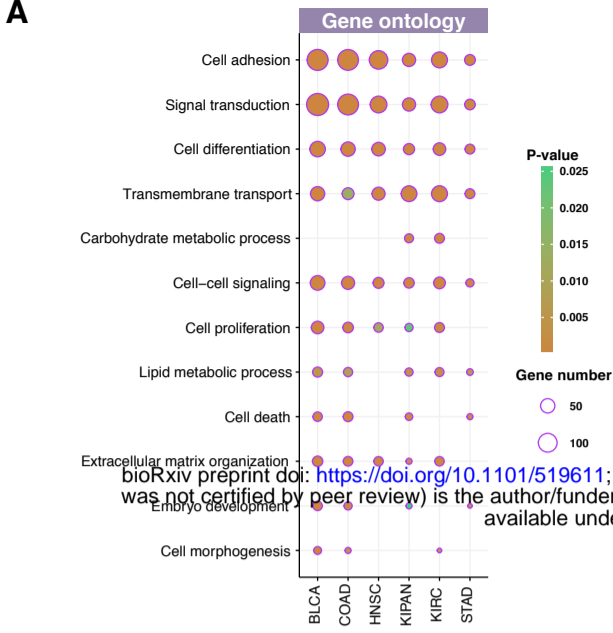

**B**

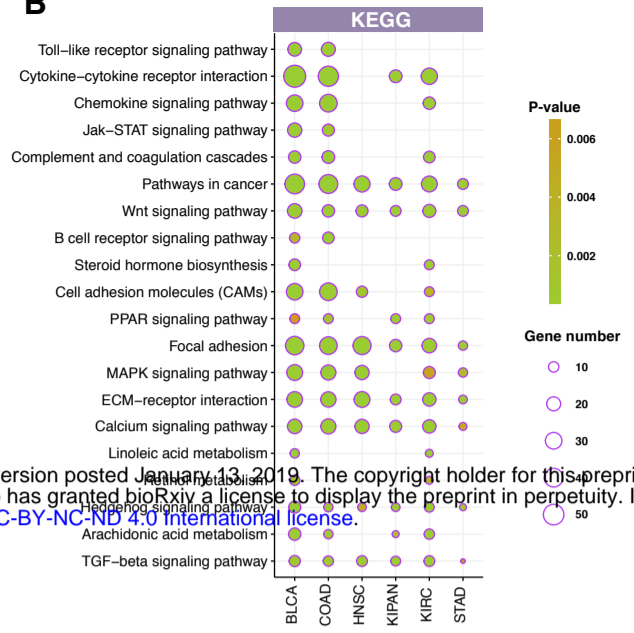

**C**

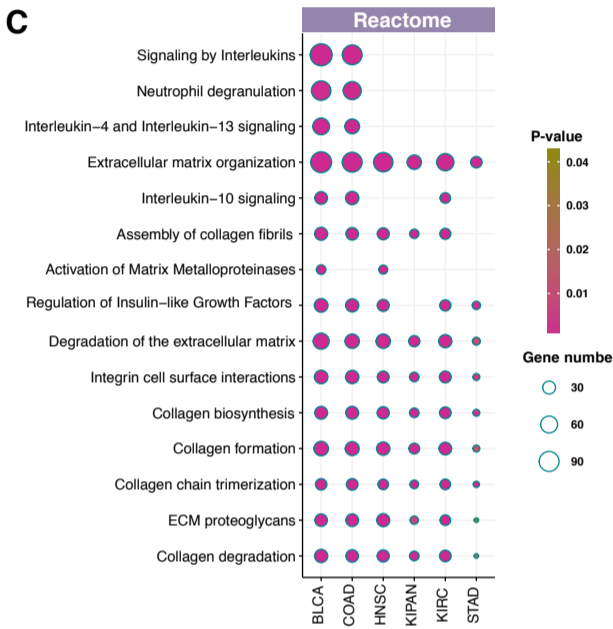

**D**

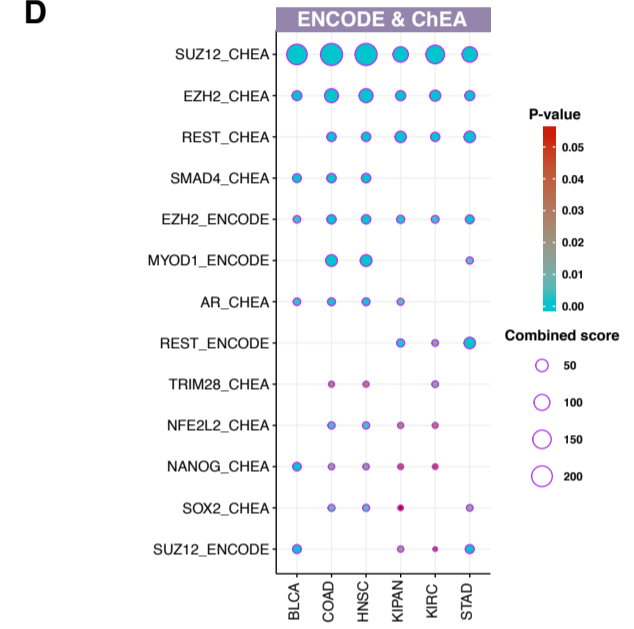

**E**

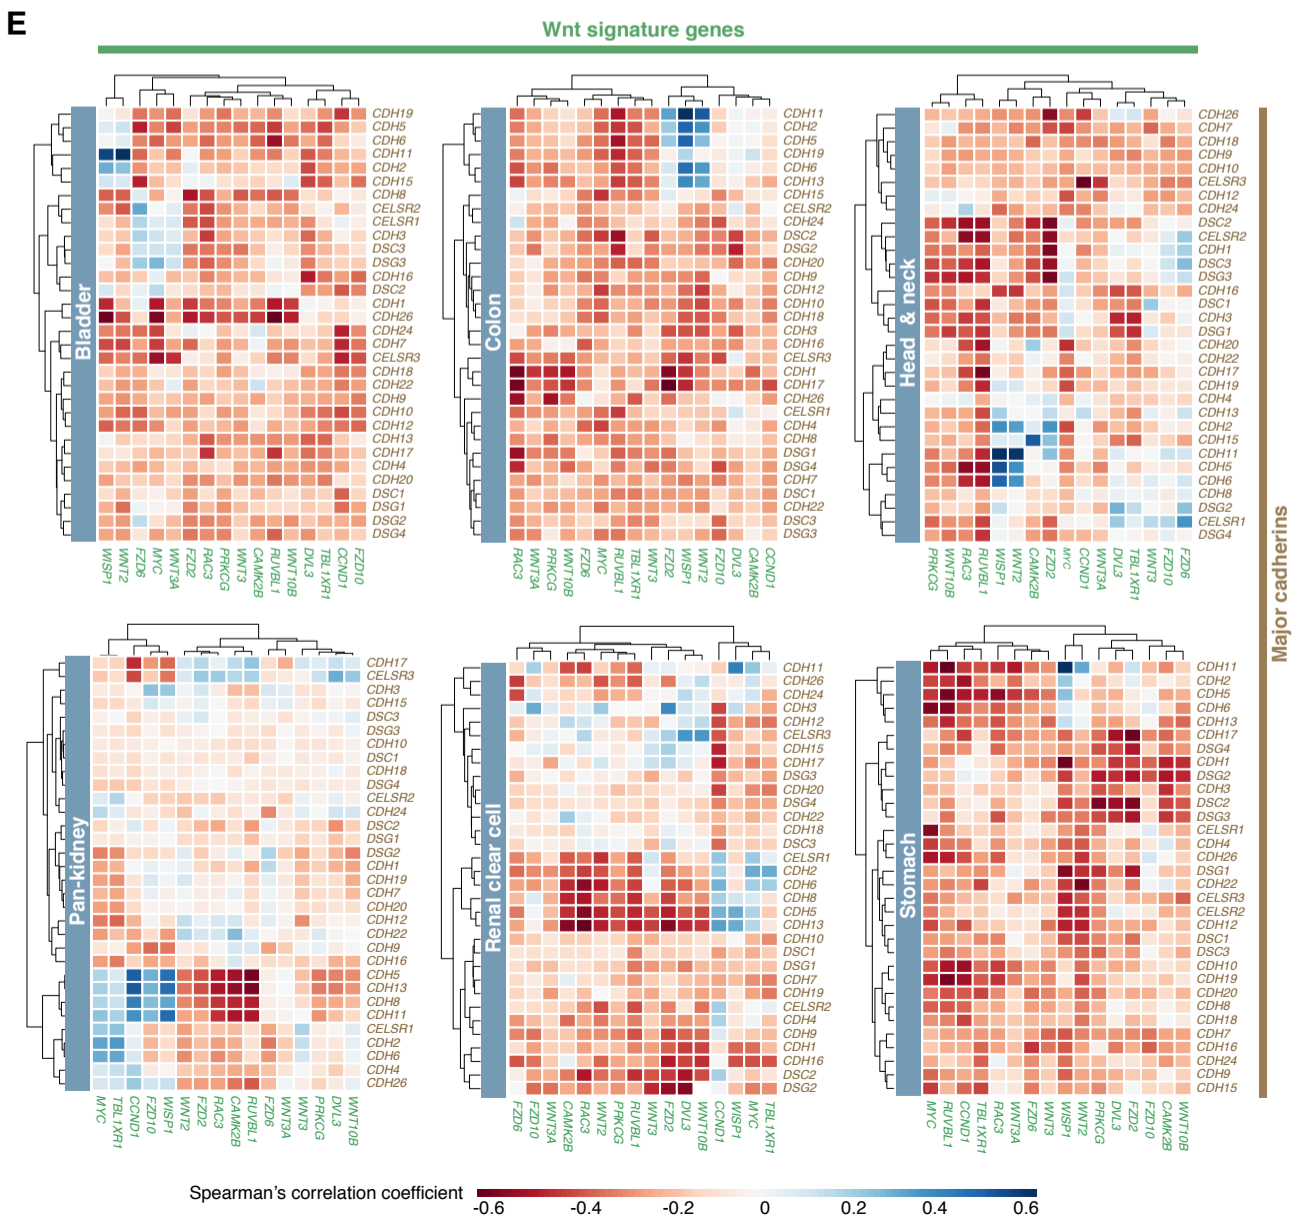

**Figure 7**

**A**

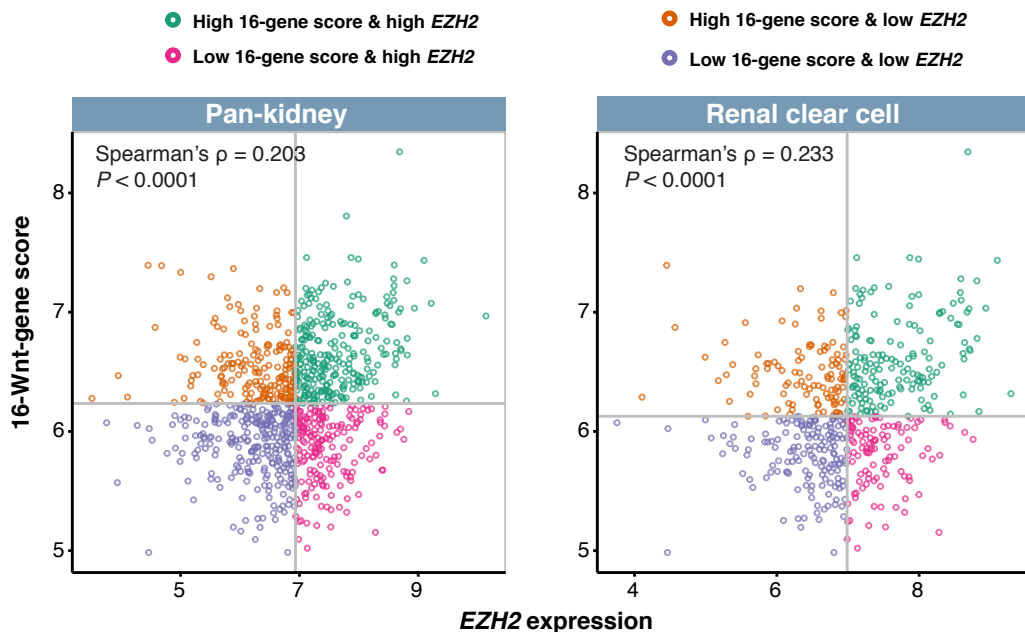

**B**

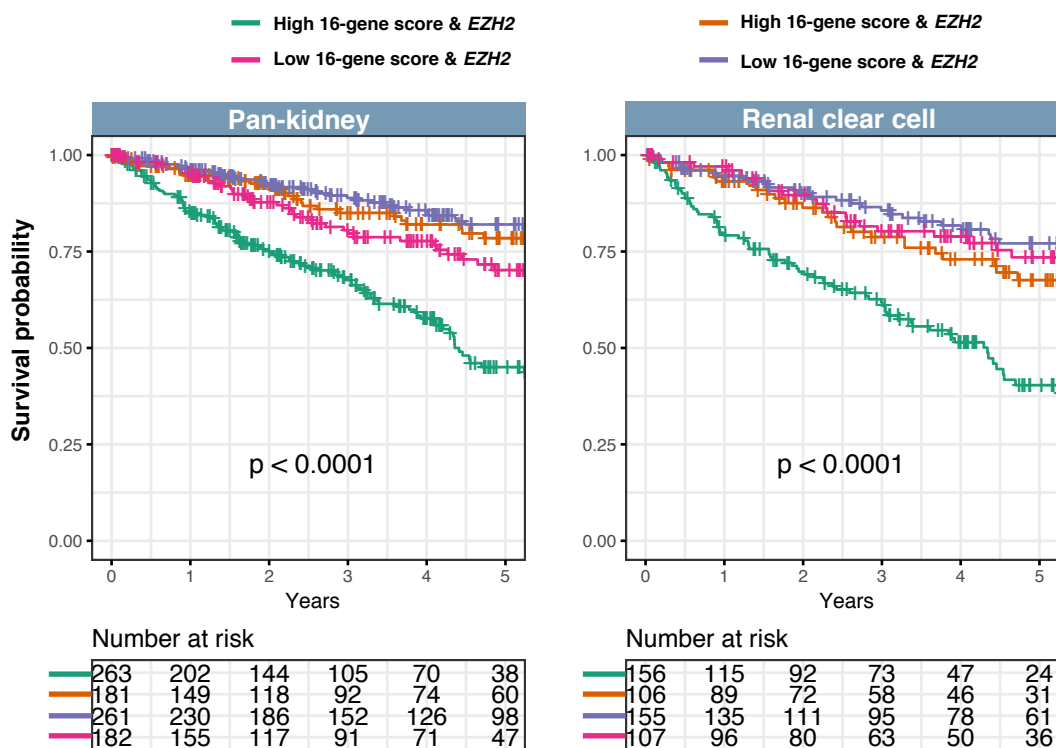

**C**

|                                                                               | Hazard Ratio (95% CI) | P-value         |
|-------------------------------------------------------------------------------|-----------------------|-----------------|
| <b>Pan-Kidney</b>                                                             |                       |                 |
| High 16-gene score & high <i>EZH2</i> vs. low 16-gene score & low <i>EZH2</i> | 3.444 (2.430 - 4.882) | <b>3.66E-12</b> |
| High 16-gene score & low <i>EZH2</i> vs. low 16-gene score & low <i>EZH2</i>  | 1.075 (0.683 - 1.693) | 0.75            |
| Low 16-gene score & high <i>EZH2</i> vs. low 16-gene score & low <i>EZH2</i>  | 1.665 (1.105 - 2.508) | <b>0.014</b>    |
| <b>Clear cell renal cell</b>                                                  |                       |                 |
| High 16-gene score & high <i>EZH2</i> vs. low 16-gene score & low <i>EZH2</i> | 3.633 (2.412 - 5.471) | <b>6.63E-10</b> |
| High 16-gene score & low <i>EZH2</i> vs. low 16-gene score & low <i>EZH2</i>  | 1.564 (0.959 - 2.549) | 0.073           |
| Low 16-gene score & high <i>EZH2</i> vs. low 16-gene score & low <i>EZH2</i>  | 1.282 (0.776 - 2.115) | 0.33            |
